# Supplementary material for: <em>NADP-Dependent Malic Enzyme</em> Genes in Sweet Pepper Fruits: Involvement in Ripening and Modulation by Nitric Oxide (NO)
Source: Preprints.org preprint supplement (doi:10.20944/preprints202305.1587.v1), 2023-05-23
Supplement: Supplementary file 1 [file supplementary]

|          |                                                                       |     |
|----------|-----------------------------------------------------------------------|-----|
| NADP-ME1 | MFSLNGTTFDNLSCGISRCLTTQSRKRVSVPMVV--VSSNGRAADGNVSVLMENTLKES           | 58  |
| NADP-ME5 | MFSLNGSSFTNNSLSGVSRCLTQSC--RRVSAPMVVAAVSSNGKPGDGHVSVLVENALTES         | 59  |
| NADP-ME3 | -----MISFTIPNPLRKALGKRSSGRINIRVVMESTLKEL                              | 35  |
| NADP-ME2 | -----                                                                 | 0   |
| NADP-ME4 | -----MESKMKEK                                                         | 8   |
|          |                                                                       |     |
| NADP-ME1 | ---VAVIEKDDFKSTVSGGVGDVYGEDTASEDQITPWTFSVASGYSLLRDPHYNKGGLAF          | 115 |
| NADP-ME5 | ---PVPVEK-ETKSTVTGGVGDVYGEDSATEDQSITPWTLSVASGFSLLRNPHYNKGGLAF         | 115 |
| NADP-ME3 | SNGESVLDV-KDKCGVGGGVEDLYGEDRATEDQITPWTFSVASGYSLLRDPHYNKGGLAF          | 94  |
| NADP-ME2 | -----MESTLKEQIPAGGVEDVYGEDCATEDQCITPWTIAVSSGYNLLRDPHYNKGGLAF          | 54  |
| NADP-ME4 | S--ESVVDMSPTSAVVEGGVEDIYGEDCATEDQLITPWTFAQVSSGYNLLRDPHYNKGGLAF        | 66  |
|          | : : * * * * * : * * * * * : * * * * * : * * * * * : * * * * *         |     |
|          | Putative nitration                                                    |     |
| NADP-ME1 | SEKERDSHYLSSGLLPPVVVDQELQVKVMNVLRQYDVPLQRYMAMMDLQERNERLIFYKLL         | 175 |
| NADP-ME5 | SERERDTHYLRGLLPPVVITHDLQVKMMNSIRKYDVPLQRYMAMMDLQEMNERLIFYKLL          | 175 |
| NADP-ME3 | TDARDAHYLRGLLPPSVSNQELQEKVMHNLRLYQVPLQRYMAMMDLQERNERLIFYKLL           | 154 |
| NADP-ME2 | TERERDAHYLRGLLPPVVSTQELQEKKLMQSIQYDPLHKYVAMMELEBERNERLIFYKLL          | 114 |
| NADP-ME4 | TEQERDVHYLRGLLPPAVMPQELQEKRLMQTLRRYEVPLNKYVALMELQERNERLIFYKLL         | 126 |
|          | : : * * * * * : * * * * * : * * * * * : * * * * * : * * * * *         |     |
|          | NADP-binding site                                                     |     |
| NADP-ME1 | MENVEELLPIVYTFPTVGEACQKYGSIFRKPQGLFISLKEKGKILEVLKNWPEKKIQIVIV         | 235 |
| NADP-ME5 | IDNVEELLPIVYTPTVGEACQKYGSIFRKPQGLFISLKEKGKIHVLKNWPEKKIQIVIV           | 235 |
| NADP-ME3 | IDNVEELLPVVYTPTVGEACQKYGSIFRKPQGLFISLKEKGKILEVLKNWPEKSIQIVIV          | 214 |
| NADP-ME2 | IDNVEELLPIVYTPTVGEACQKYGSIFRKPQGLYISLKEKGRILEVLKNWPEKSIQIVIV          | 174 |
| NADP-ME4 | IDNVEELLPIVYTPTVGEACQKYGSIFRKPQGLYISLKEKGRILEVLKNWPERKIQIVIVI         | 186 |
|          | : : * * * * * : * * * * * : * * * * * : * * * * * : * * * * *         |     |
|          | NADP-binding site                                                     |     |
| NADP-ME1 | TDGERILGLGDLGCQGMGIPVGKLSLYTALGGIRPSACLPTIDVGTNNKELLEDEFYIG           | 295 |
| NADP-ME5 | TDGERILGLGDLGCQGMGIPVGKLSLYTALGGIRPSACLPTIDVGTNNMNLNDEFYIG            | 295 |
| NADP-ME3 | TDGERILGLGDLGCQGMGIPVGKLSLYTALGGVVRPSVCLPITIDVGTNNQQLLDDEFYIG         | 274 |
| NADP-ME2 | TDGERILGLGDLGCQGMGIPVGKLALYTALGGVVRPSACLPTIDVGTNNKELLEDEFYIG          | 234 |
| NADP-ME4 | TDGERILGLGDLGCQGMGIPVGKLALYTALGGVVRPSACLPTIDVGTNNQQLLDDEFYIG          | 246 |
|          | : : * * * * * : * * * * * : * * * * * : * * * * * : * * * * *         |     |
|          | Metal-binding residues                                                |     |
| NADP-ME1 | LRQRRARGQEYAEELLDEFMSSVKQTYGEKVLIQFEDFANHNAFDLLEKYGTSHLVFNDDI         | 355 |
| NADP-ME5 | LRQRRATGQEYAEELLDEFMYAVKQNYGEKVLIQFEDFANHNAFDLLAKYGTSHLVFNDDI         | 355 |
| NADP-ME3 | LKQKRARGQEYAEELLDEFMSAVKQNYGERVLIQFEDFANHNAFELLAKYRTHLVFNDDI          | 334 |
| NADP-ME2 | LRQNRATGQEYYDFLHEFMSAVKQNYGEKILIQFEDFANHNAFELLAKYRTHLVFNDDI           | 294 |
| NADP-ME4 | LRQKRATGKEYHDFLDEFMKAVKQNYGEKVLIQYEDFANHNAFELLAKYGTSHLVFNDDI          | 306 |
|          | : : * * * * * : * * * * * : * * * * * : * * * * * : * * * * *         |     |
| NADP-ME1 | QGTASVVLAGLMAALNLVGGNLQAHTFLFLGAGEAGTGIAELIALEMSK-----QTGAPL          | 410 |
| NADP-ME5 | QGTASVVLAGLMAALNLVGGTLAHTFLFLGAGEAGTGIAELIALEMSKQFLVLTGTGIPL          | 415 |
| NADP-ME3 | QGTASVVLAGLIASLKLGGTLADHTFLFLGAGEAGTGIAELIALEITK-----KTSVPL           | 389 |
| NADP-ME2 | QGTASVVLAGLIASLKLGGALCDHTFLFLGAGEAGTGIAELIALEISK-----KTNTPV           | 349 |
| NADP-ME4 | QGTAAVVLAGLVASLKLGGSLADHTFLFFGAGEAGTGIAELIALAISK-----KTNAVP           | 361 |
|          | : : * * * * * : * * * * * : * * * * * : * * * * * : * * * * *         |     |
| NADP-ME1 | EETRKKIWMVDSKGLIVSRMESLQHFKMPWAHDHEPVKELVNAVKLKPTILIGSSGTG            | 470 |
| NADP-ME5 | EETRKKIWMVDSKGLIVKSRMEMLQHFKRPWAHDHEPVKELVNAVKSIKPTVLIGSSGTG          | 475 |
| NADP-ME3 | EVARKKIWLVDISKGLIVSRVESLQHFKKPWAHDHEPVKELIDAVKAIKPTVLIGTSGVG          | 449 |
| NADP-ME2 | EETRKKIWLVDISKGLIVSRGKGTQAQFKPWAHEHEPVNNLLDAVKAVKPSVLIGTSGVG          | 409 |
| NADP-ME4 | EEARKKIWLVDISKGLIVSRKESLQAQKKPWAHEHEPVNNLLDTVKAIKPTAIGTSGVG           | 421 |
|          | : : * * * * * : * * * * * : * * * * * : * * * * * : * * * * *         |     |
| NADP-ME1 | KTFTKEVVRTIATFNKFMQKPVIFALSNPTSQSECTAEAEYTWSDGRAIFASGSPFAPV           | 530 |
| NADP-ME5 | RTFTKEVVQAMATFN---EKPIIFALSNPTSQSECTAEAEYSWSEGRAIFASGSPFAPV           | 531 |
| NADP-ME3 | KTFTKEVVEAMASLN---PKPLVMALSNPTSQAECTAEAEYTWKSGHAIIFASGSPFPDPF         | 505 |
| NADP-ME2 | RTFTKEVVEAMASMN---ERPLIMALSNPTSQAECTAEAEYTWSEGRAVFASGSPFPSPF          | 465 |
| NADP-ME4 | RTFTKEVIEAMASIN---KRPLIMALSNPTEQSECTAEAEYAWSEGRAVFASGSPFPFPV          | 477 |
|          | : * * * * * : : : : * : * * * * * : * * * * * : * * * * * : * * * * * |     |
| NADP-ME1 | EYEGKVFMSGQANNAYIFPGLGLLIISGAIRVHDDMLLAASEALAAEVSKENFEKGLIY           | 590 |
| NADP-ME5 | EYKGVVYASGQANNAYIFPGFGLGLIISGAIRVHDDMLLVASEALAEQVSKENFEKGLIY          | 591 |
| NADP-ME3 | EFEGRFTVSGQANNAYIFPGFGLGLIIMSGTIRVHDDMLLAASEALAAEVTEDDYLKGRYI         | 565 |
| NADP-ME2 | EYNKLYFPQANNACYIFPGFGLVMSGTIRVHDDMLLAASEALAAQVTDDEHYAKGMIY            | 525 |
| NADP-ME4 | EYNNKLHIPSQANNACYIFPGFGLVMAGAIRVHNDMLLAASEALAGQVTEHYVKGIY             | 537 |
|          | : : : . . . * * * * * : * * * * * : * * * * * : * * * * * : * * * * * |     |
| NADP-ME1 | PPFANIRKISAHIAAKVAAKAYELGLATRLPQPENLVSYAESCMYSPSYRSYR                 | 643 |
| NADP-ME5 | PPFANIRKISAHIAAKVAAKAYELGLATRLPEPKDLIAYAESCMYSPAYRSYR                 | 644 |
| NADP-ME3 | PPFTNIRKISAHIAAEVAAKAYELGLATHLPRPKDLVKYAESCMYTPVYRHYR                 | 618 |
| NADP-ME2 | PPFADIRKISAHIAARVAAKAYELGVATRLPRPADLVKYAESCMYTPNYSYR                  | 578 |
| NADP-ME4 | PPFGIIRKISAHIAANVAARAYGLVATRLPPADLVKYAESCFYSPNYRCYR                   | 590 |
|          | : * * * * * : * * * * * : * * * * * : * * * * * : * * * * *           |     |

**Supplementary Figure S1. Alignment of the five NADP-ME sequences from pepper identifying the conserved NADP (blue) and metal binding (green) sites, and the possible tyrosine (Y) residue capable of being nitrated (orange). Asterisks denote the shared amino acids among all NADP-MEs.**

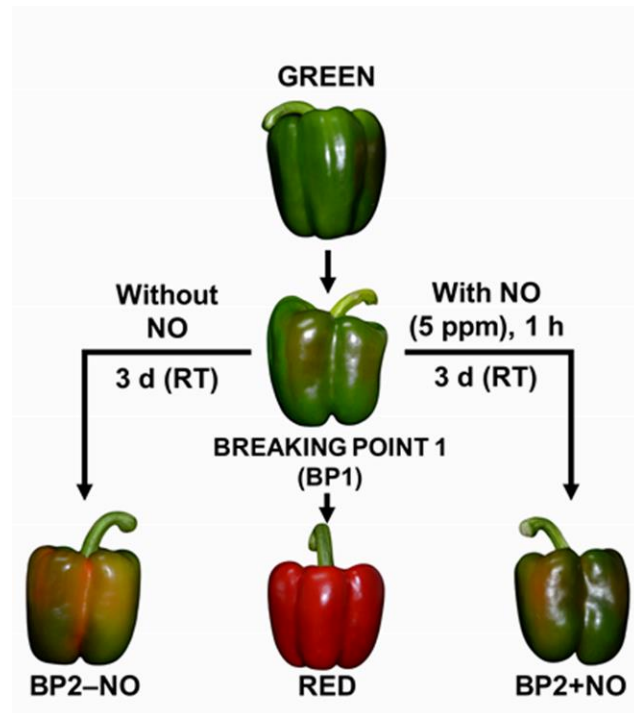

**Supplementary Figure S2.** Illustrative picture showing the experimental design used in this study with the representative phenotype of sweet pepper (*Capsicum annuum* L.) fruits at different stages and treatments: immature green, breaking point 1 (BP1), breaking point 2 without NO treatment (BP2 – NO), breaking point 2 with NO treatment (BP2 + NO), and ripe red. Fruits were subjected to a NO-enriched atmosphere (5 ppm) in a hermetic box for 1 h and were then stored at room temperature (RT) for 3 days. Reproduced with permission from González-Gordo et al. (2022).
